# Supplementary material for: The AKT1E17K Allele Promotes Breast Cancer in Mice
Source: MDPI journal article supplement (doi:10.3390/cancers14112645), 2022-05-26
Supplement: s1 [file s1]

**Table S1.** Table of selected gene sets from Hallmark MsigDB collection enriched in the tumors from R26AKT1E17K;MMTV-Cre mice.

| Gene set                          | es   | p-value | NES  |
|-----------------------------------|------|---------|------|
| E2F TARGETS                       | 0,64 | 0       | 2,64 |
| G2M CHECKPOINT                    | 0,59 | 0       | 2,42 |
| MYC TARGETS V1                    | 0,57 | 0       | 2,30 |
| MITOTIC SPINDLE                   | 0,51 | 0       | 2,06 |
| EPITHELIAL-MESENCHYMAL TRANSITION | 0,50 | 0       | 2,05 |
| P53 PATHWAY                       | 0,49 | 0       | 2,02 |
| DNA REPAIR                        | 0,50 | 0       | 1,98 |
| PROTEIN SECRETION                 | 0,51 | 0       | 1,88 |
| UNFOLDED PROTEIN RESPONSE         | 0,47 | 5,0E-04 | 1,79 |
| ESTROGEN RESPONSE_LATE            | 0,43 | 0       | 1,79 |
| WNT/ $\beta$ -CATENIN SIGNALING   | 0,52 | 0,0015  | 1,67 |
| PI3K/AKT/MTOR SIGNALING           | 0,44 | 0       | 1,66 |
| ANDROGEN RESPONSE                 | 0,44 | 5,0E-04 | 1,65 |
| TNF- $\alpha$ SIGNALING VIA NFKB  | 0,39 | 5,0E-04 | 1,60 |
| APICAL JUNCTION                   | 0,38 | 5,0E-04 | 1,57 |
| IL6/JAK/STAT3 SIGNALING           | 0,43 | 0,0035  | 1,57 |
| APOPTOSIS                         | 0,38 | 5,0E-04 | 1,55 |
| TGF- $\beta$ SIGNALING            | 0,46 | 0,0055  | 1,52 |
| ESTROGENRESPONSE EARLY            | 0,36 | 0,0015  | 1,48 |
| MYC TARGETS V2                    | 0,44 | 0,009   | 1,48 |

**Table S2.** Table of selected gene sets from GO mSigDB collection enriched in the tumors derived from R26AKT1E17K; MMTV-Cre mice and TCGA BC dataset.

| GO Gene set                                            | R26AKT1 <sup>E17K</sup> ;MMTV-Cre |      |      | TCGA |      |      |
|--------------------------------------------------------|-----------------------------------|------|------|------|------|------|
|                                                        | Rank                              | es   | NES  | Rank | es   | NES  |
| NEGATIVE REGULATION OF RETINOIC ACID RECEPTOR          | 1                                 | 0,90 | 2,62 | NV   | NV   | NV   |
| KINETOCHORE                                            | 2                                 | 0,68 | 2,57 | 8,00 | 0,69 | 2,16 |
| SISTER CHROMATID SEGREGATION                           | 3                                 | 0,64 | 2,56 | 1,00 | 0,70 | 2,26 |
| CHROMOSOME CENTROMERIC REGION                          | 4                                 | 0,64 | 2,56 | 5,00 | 0,68 | 2,20 |
| SISTER CHROMATID COHESION                              | 5                                 | 0,67 | 2,51 | 3,00 | 0,72 | 2,25 |
| CONDENSED CHROMOSOME CENTROMERIC REGION                | 6                                 | 0,69 | 2,50 | 2,00 | 0,73 | 2,25 |
| REGULATION OF RETINOIC ACID RECEPTOR SIGNALING PATHWAY | 7                                 | 0,79 | 2,37 | NV   | NV   | NV   |
| MITOTIC SISTER CHROMATID SEGREGATION                   | 8                                 | 0,64 | 2,34 | 6,00 | 0,72 | 2,17 |
| RETINOIC ACID RECEPTOR BINDING                         | 9                                 | 0,67 | 2,22 | NV   | NV   | NV   |
| DNA REPLICATION INDEPENDENT NUCLEOSOME ASSEMBLY        | 10                                | 0,68 | 2,15 | NV   | NV   | NV   |

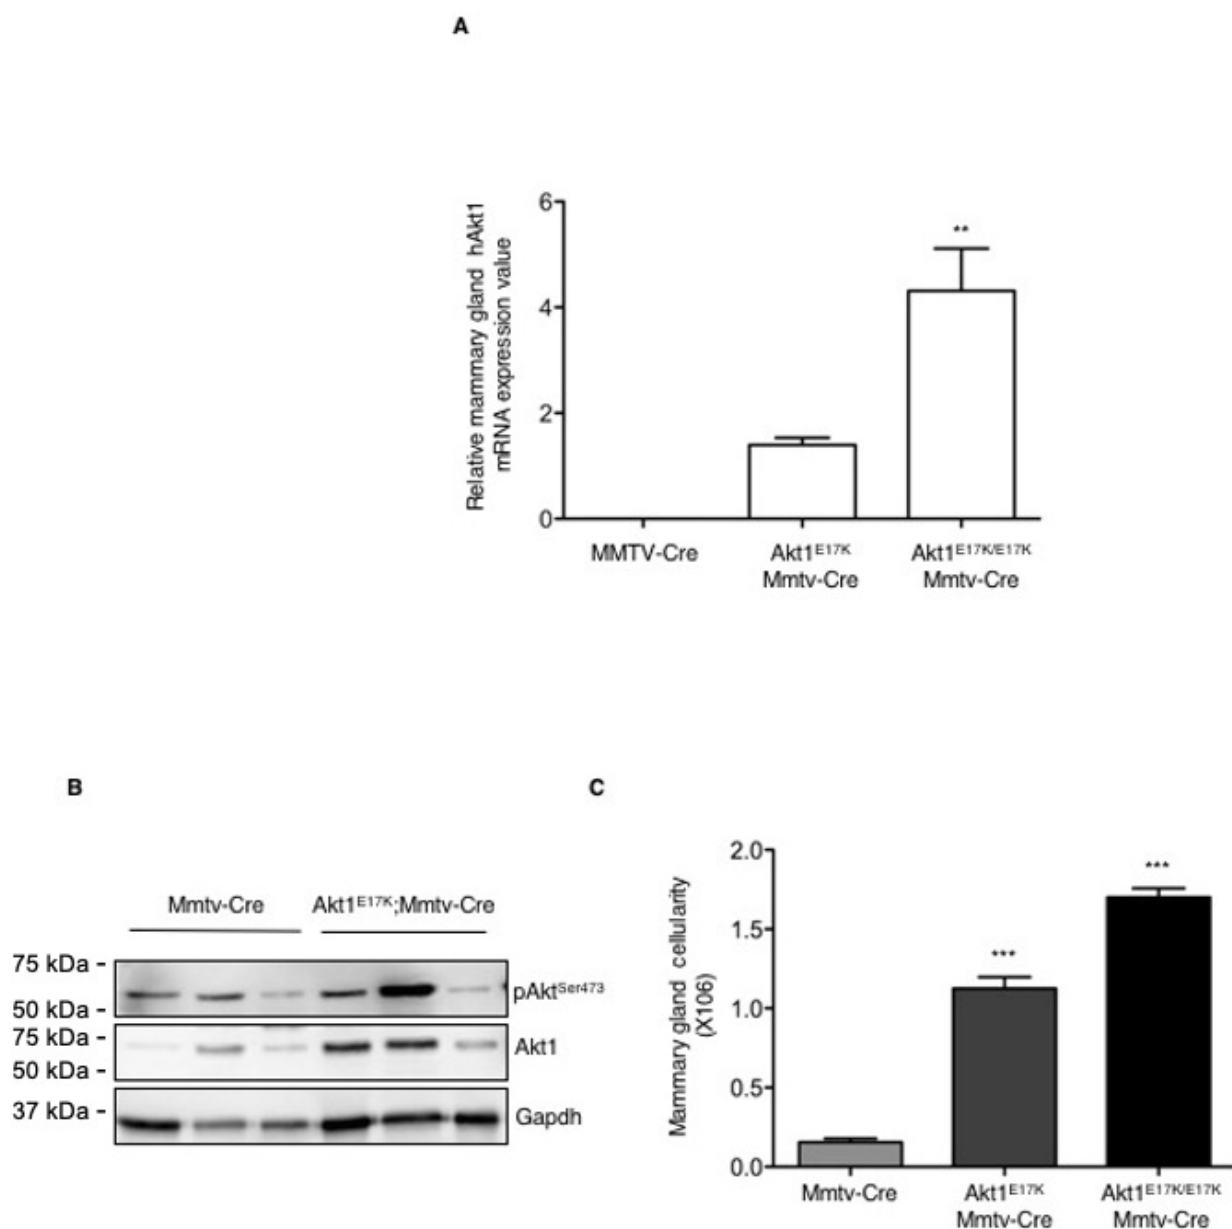

**Figure S1. Generation of transgenic R26AKT1E17K; MMTV-Cre mouse.** (A) Relative mRNA expression of human AKT1E17K allele by qRT-PCR in mammary tissues explanted from homozygous (n=8) and heterozygous (n=8) R26AKT1E17K; MMTV-Cre mice or control R26; MMTV-Cre littermates (n=7). Data indicate the mean  $\pm$  SD from at least triplicated experiments. \*\*p=0.0029. (B) Representative immunoblot analysis of pAKT and total AKT1 in protein extracts from whole mammary glands derived from R26AKT1E17K;MMTV-Cre and MMTV-Cre littermates.

(C) Trypan blue analysis of cell viability in single cell suspensions from enzymatic dissociation of whole mammary glands explanted from R26AKT1E17K;MMTV-Cre (n=5) and MMTV-Cre littermates (n=5), respectively. Data indicate mean  $\pm$  SD from at least triplicated experiments.

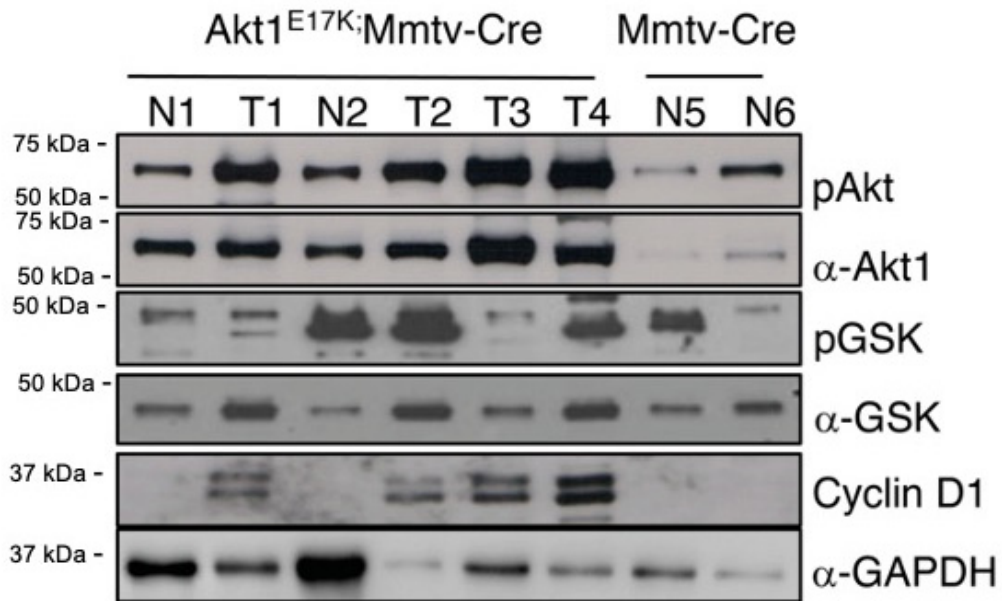

**Figure S2. Immunoblot analysis** of S473-phosphorylated AKT1 (pAKT), total AKT1, S9/22-phosphorylated GSK3 $\alpha/\beta$  (pGSK3), total GSK3 $\alpha/\beta$  (GSK3), Cyclin D1 and GAPDH performed in protein extracts derived from normal mammary tissues or tumors explanted from R26AKT1<sup>E17K</sup>;MMTV-Cre mice or in normal mammary tissues derived from MMTV-Cre mice.

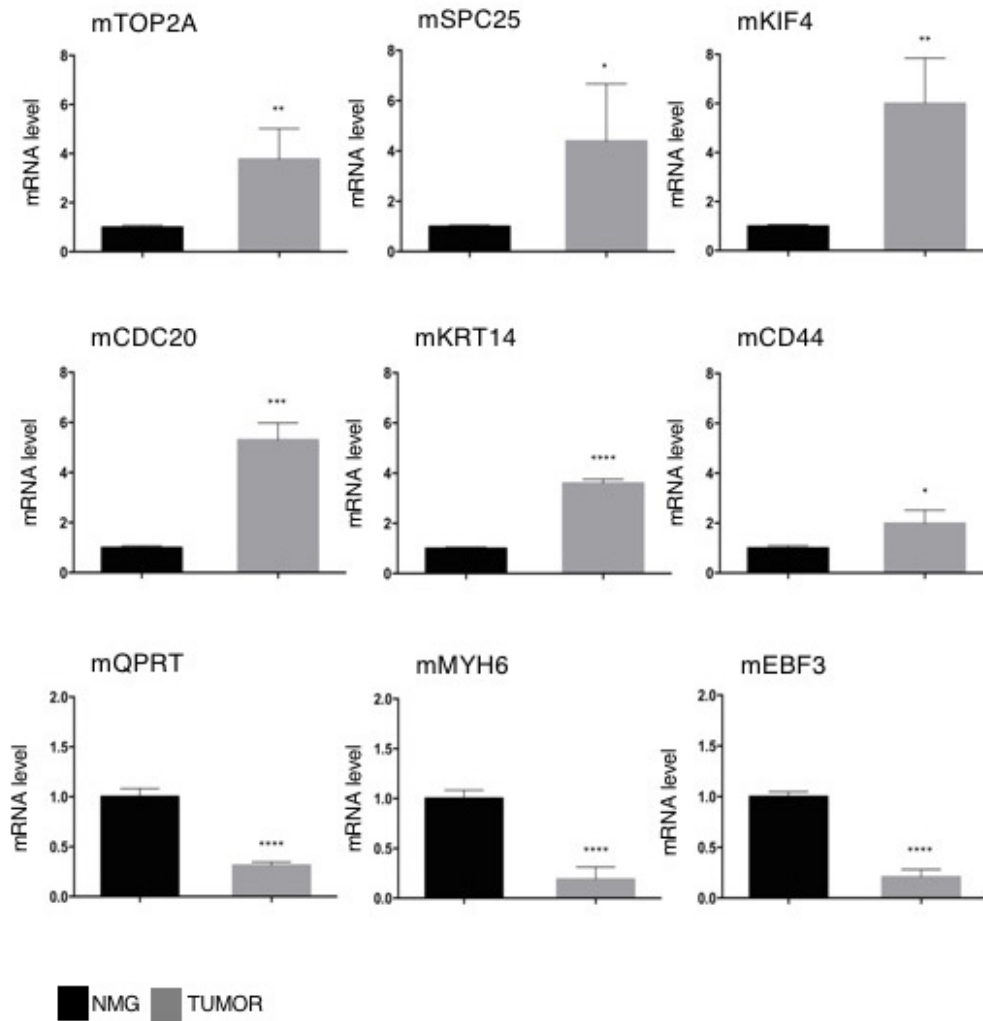

**Figure S3. Real Time PCR validation** of representative differential expressed genes. The relative amounts of mRNA were calculated by the comparative cycle threshold (CT) method (23). Quantitative (q)RT-PCR data are expressed as means  $\pm$  SD of at least three independent experiments conducted in triplicates. Statistical significance was evaluated by t-tests as indicated.

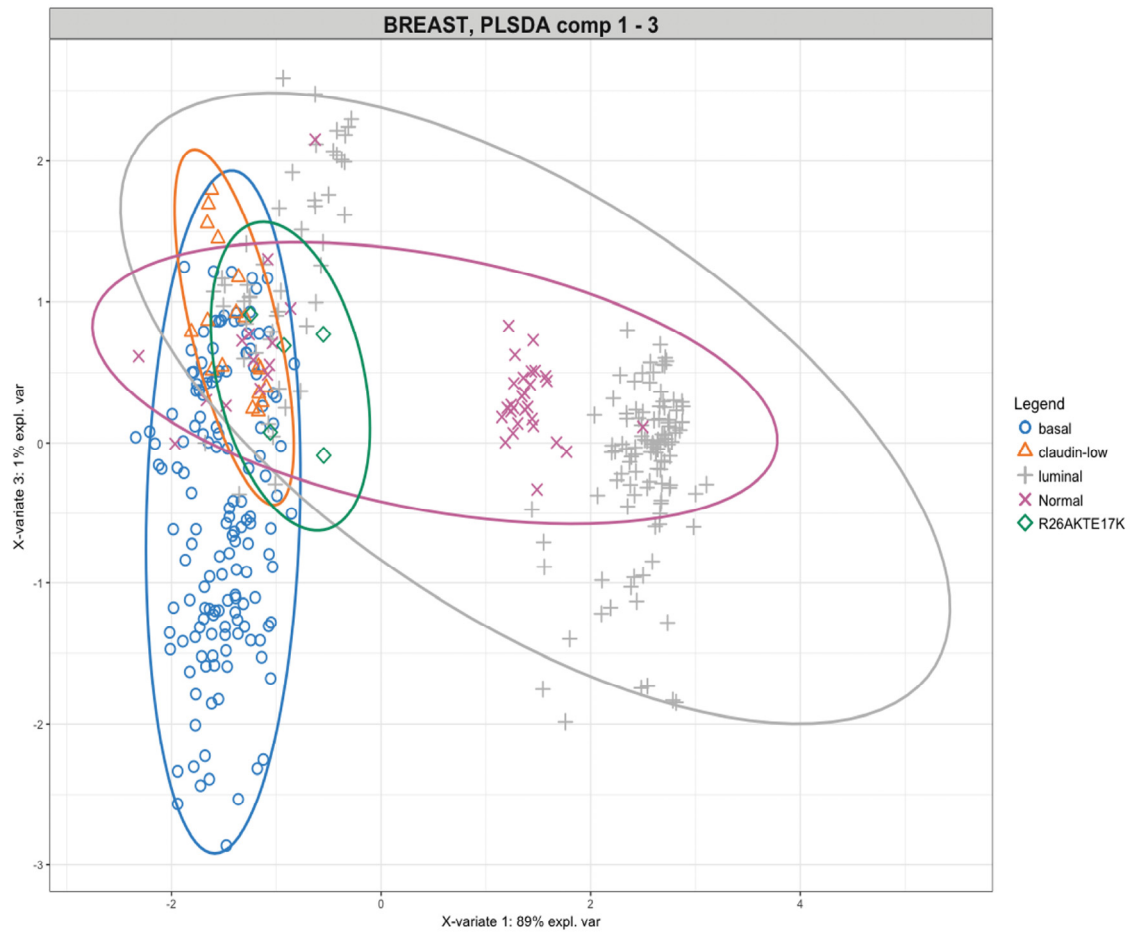

**Figure S4.** SPLS-DA representation of Principal Component 1 (PC1) on the horizontal axis has the highest variation (variability >89%) and the PC3 on the vertical axis has the second highest variation (>1%), p-value<0.05.

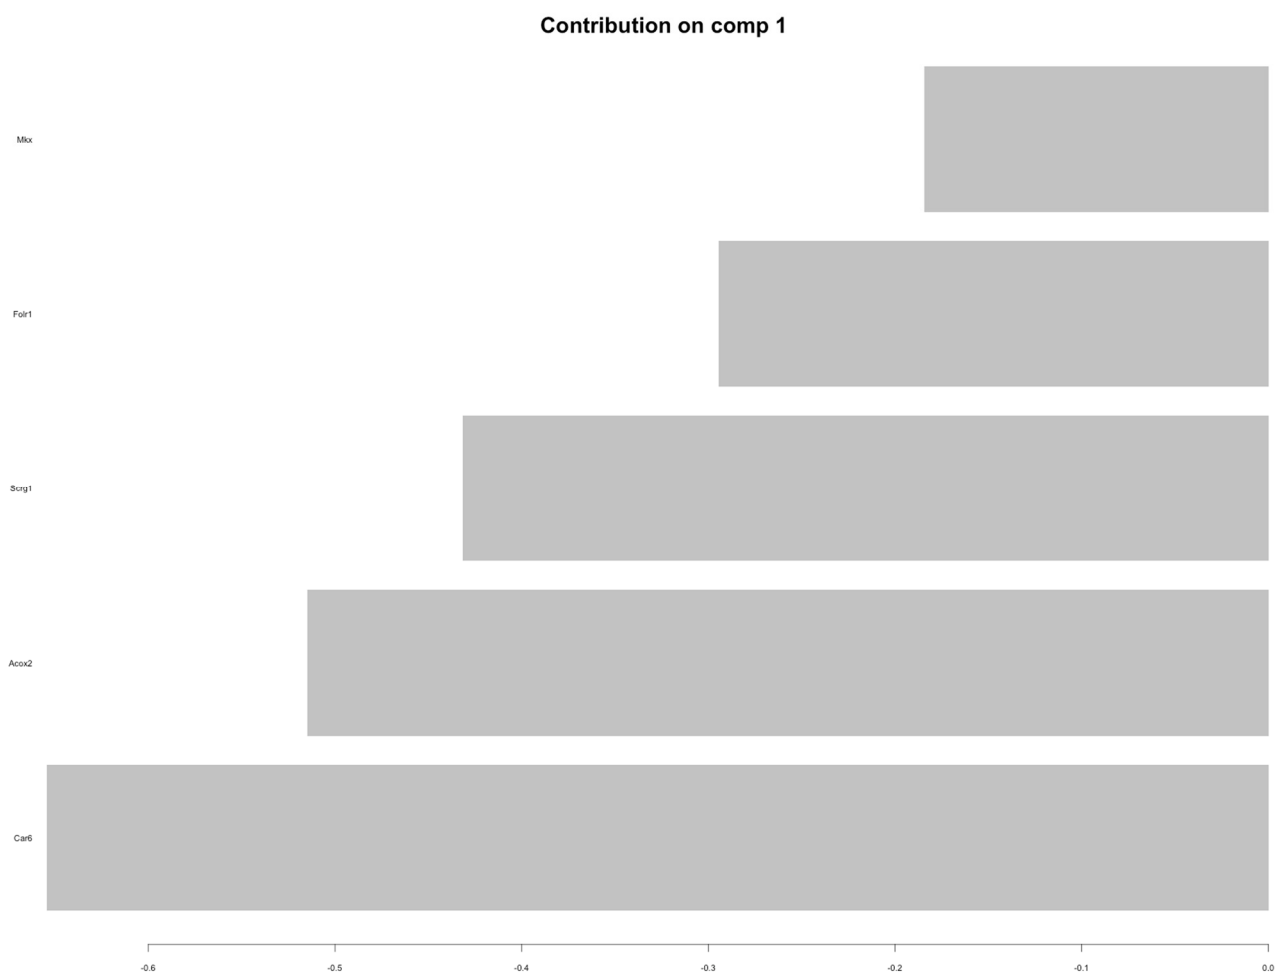

**Figure S5.** Classification analysis was performed using “mixOmics” R package 6.1.3. In the figure are reported the genes that discriminated among the three subtypes, luminal (n=8), basal (n=17) and claudin-low (n=2) in the component 1.

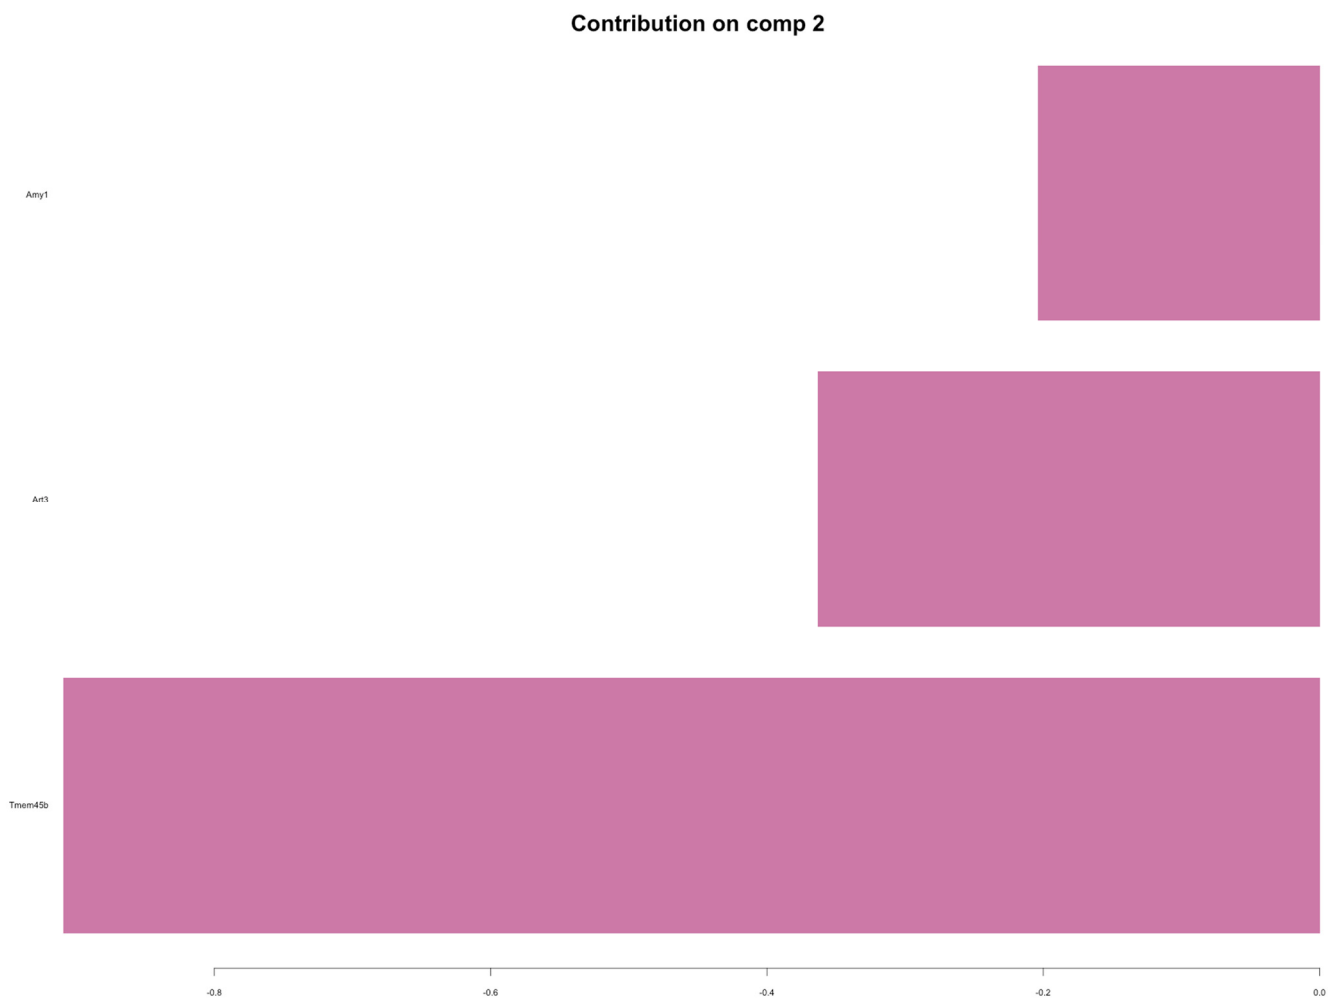

**Figure S6.** Classification analysis was performed using “mixOmics” R package 6.1.3. In the figure are reported the genes that discriminated among the three subtypes, luminal (n=8), basal (n=17) and claudin-low (n=2) in the component 2.

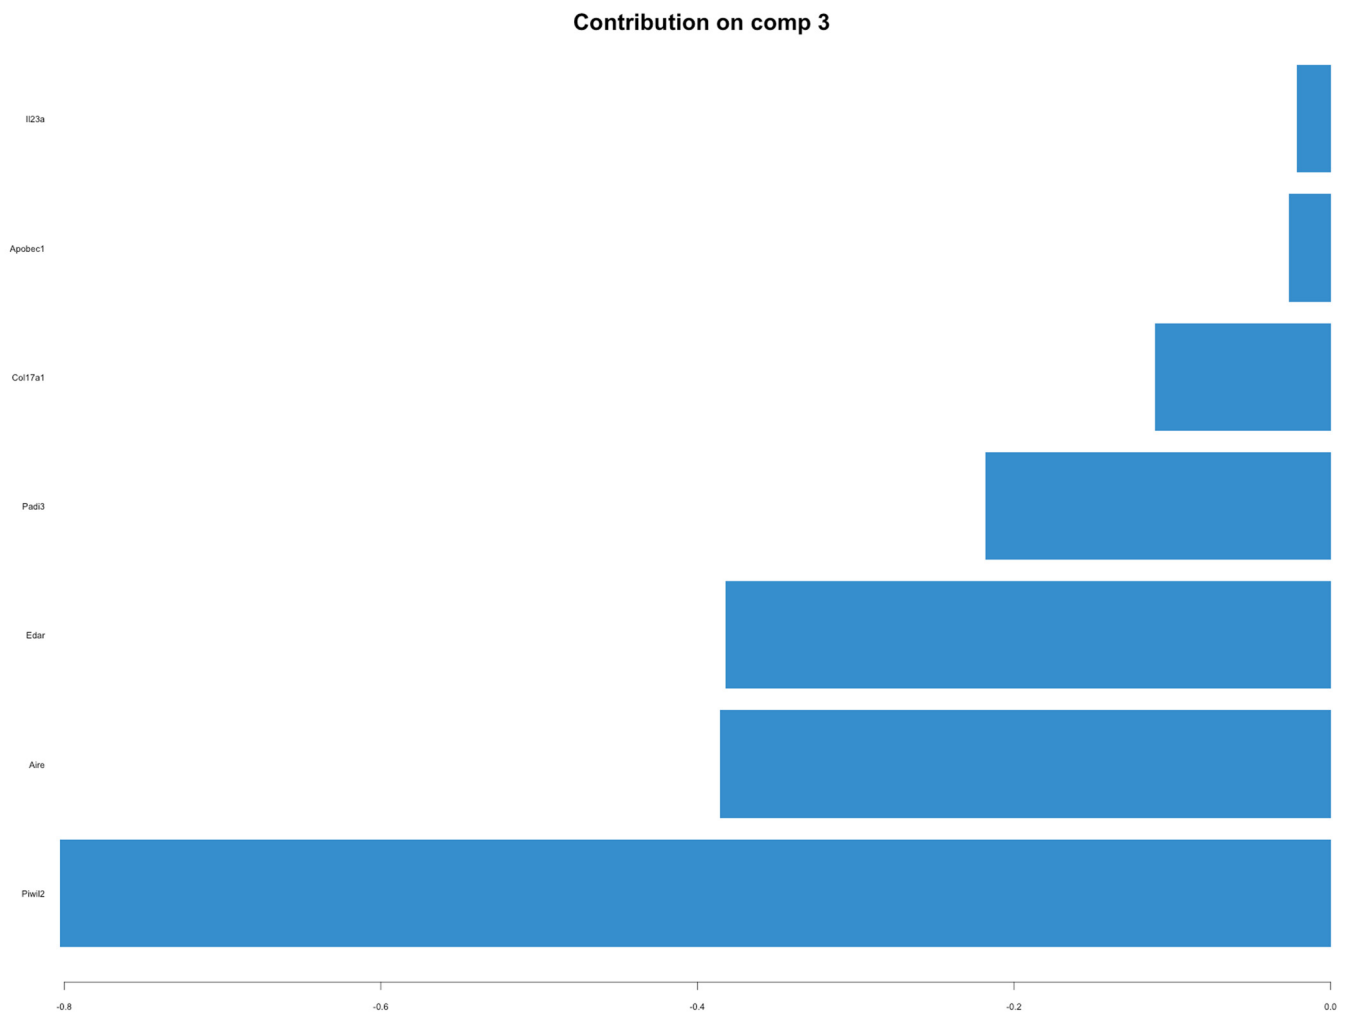

**Figure S7.** Classification analysis was performed using “mixOmics” R package 6.1.3. In the figure are reported the genes that discriminated among the three subtypes, luminal (n=8), basal (n=17) and claudin-low (n=2) in the component 3.

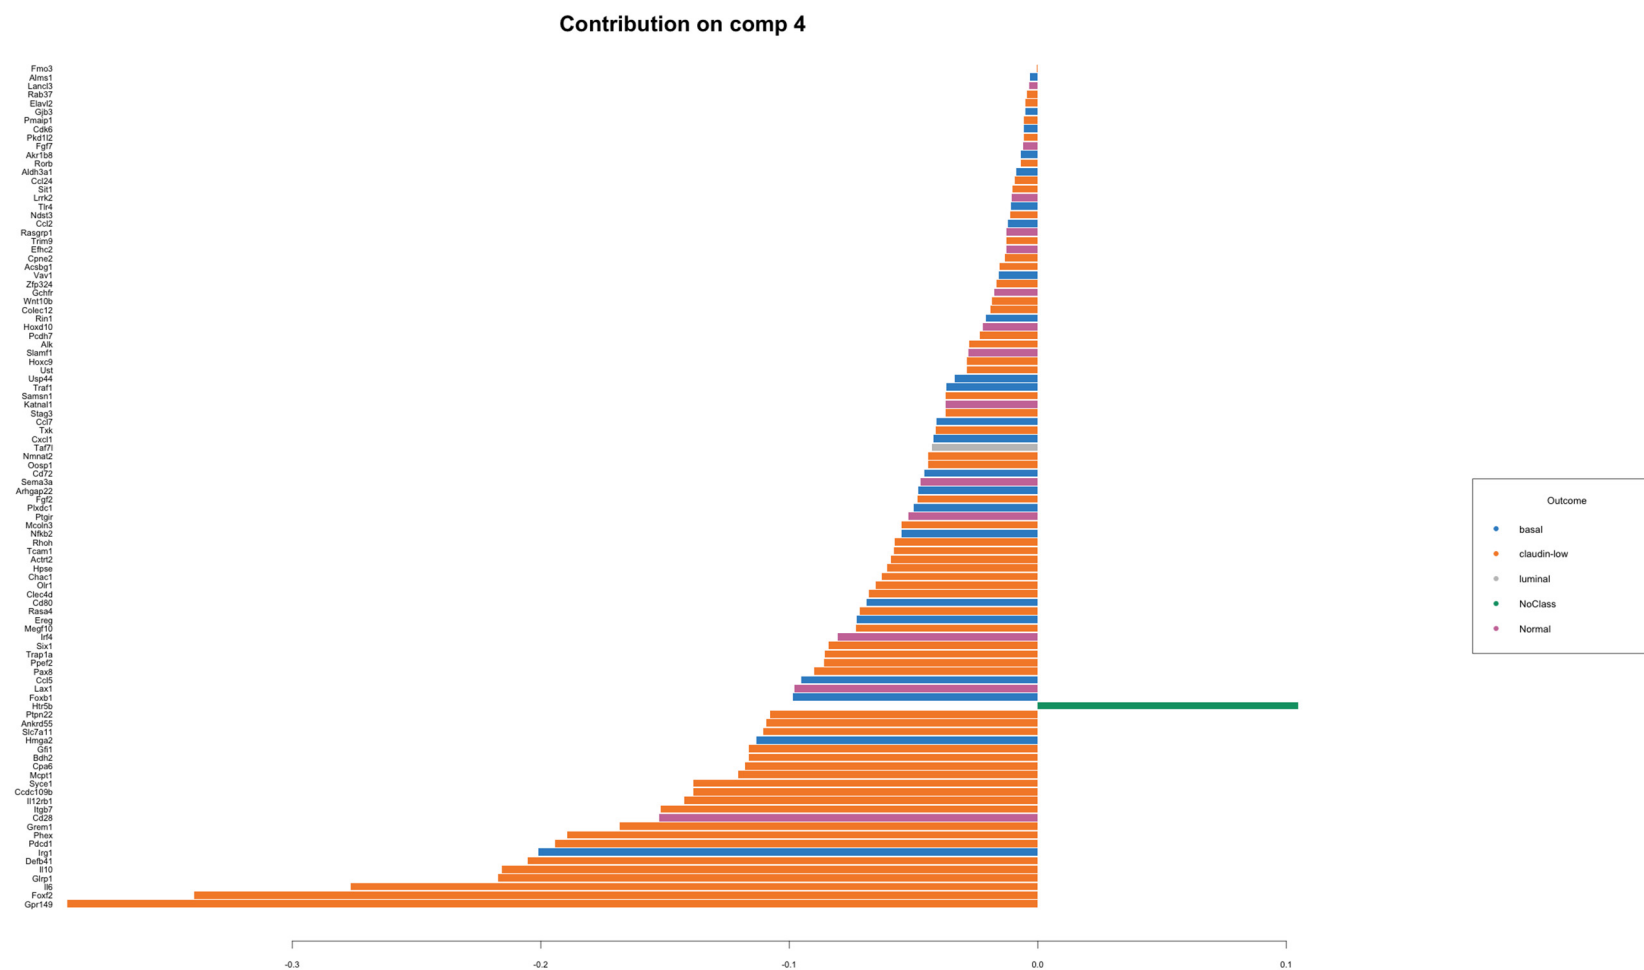

**Figure S8.** Classification analysis was performed using “mixOmics” R package 6.1.3. In the figure are reported the genes that discriminated among the three subtypes, luminal (n=8), basal (n=17) and claudin-low (n=2) in the component 4.
